# Supplementary material for: Abundant and diverse arsenic‐metabolizing microorganisms in peatlands treating arsenic‐contaminated mining wastewaters
Source: PubMed Central journal article supplement — Environ Microbiol. 2020 Feb 6;22(4):1572–87. doi: 10.1111/1462-2920.14922 (PMC7187466; doi:10.1111/1462-2920.14922), 2020-02-06
Supplement: EMI-22-1572-s001.pdf [file EMI-22-1572-s001.pdf]

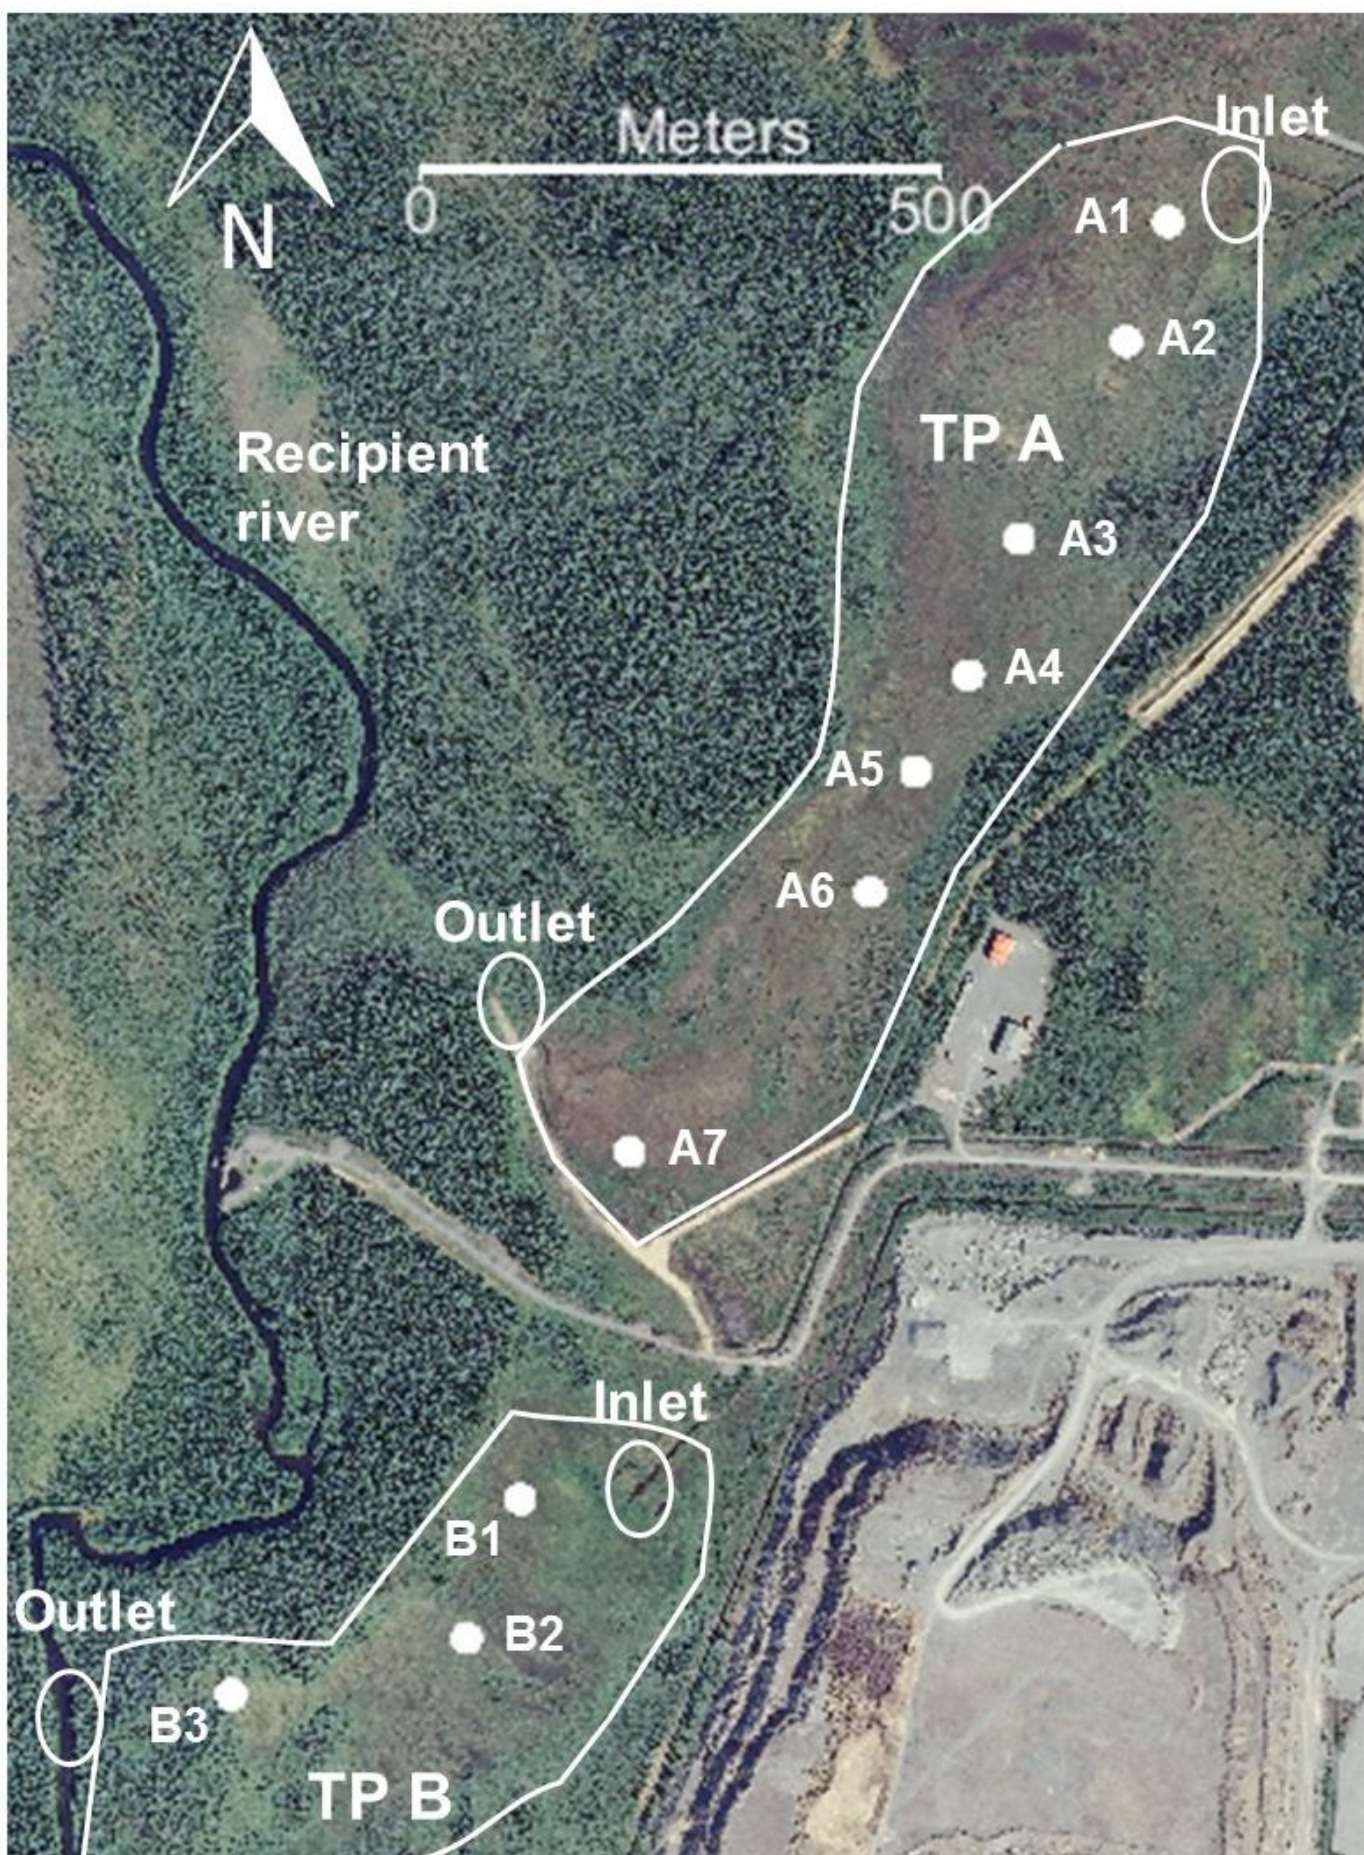

**Figure S1:** Location of sampling points in treatment peatland (TP) A and B. Boundaries of the TPs are indicated in white. The wastewater inlet and outlet points are marked with white ovals. Water samples were collected from all sampling points, soil samples were collected from sampling points TP A1, A5 and B2. The aerial photograph was provided by the National Land Survey of Finland (March 2015).

**Table S1:** Total As concentrations and As speciation in surface waters of TP A and TP B. Sampling was conducted in June 2017. Samples were stabilized on-site with HCl to prevent changes in As speciation.

| Sampling point | Distance from inlet (m) | As <sub>tot</sub> ( $\mu\text{g L}^{-1}$ ) | Arsenate ( $\mu\text{g L}^{-1}$ ) | Arsenite ( $\mu\text{g L}^{-1}$ ) | Recovery (%) |
|----------------|-------------------------|--------------------------------------------|-----------------------------------|-----------------------------------|--------------|
| TP A1          | 52                      | 20.7                                       | 17.4                              | 2.1                               | 94           |
| TP A2          | 168                     | 28.2                                       | 25.5                              | <0.1                              | 92           |
| TP A3          | 384                     | 0.3                                        | n.a. <sup>a</sup>                 | n.a.                              |              |
| TP A4          | 523                     | 0.1                                        | n.a.                              | n.a.                              |              |
| TP A5          | 629                     | 0.6                                        | n.a.                              | n.a.                              |              |
| TP A6          | 752                     | 1.4                                        | n.a.                              | n.a.                              |              |
| TP A7          | 1083                    | < 0.1                                      | n.a.                              | n.a.                              |              |
| TP B1          | 203                     | 33.1                                       | 28.9                              | <0.1                              | 87           |
| TP B2          | 324                     | 30.9                                       | 26.2                              | 1.6                               | 90           |
| TP B3          | 539                     | 28.2                                       | 22.7                              | 4.3                               | 96           |

<sup>a</sup> not analyzed: As speciation could not be analyzed due to too low total As concentrations.

**Table S2:** Arsenic concentrations in peat and porewater at the point where samples were taken for incubations and molecular studies. Samples were taken in June 2017. Porewater samples were flash frozen on-site to prevent changes in As speciation.

| Sampling point | Depth<br>(cm)   | Peat                                        | Porewater                                  |                                   |                                   |                                                |                                               |                                                     |                                                     | Recovery<br>(%) |
|----------------|-----------------|---------------------------------------------|--------------------------------------------|-----------------------------------|-----------------------------------|------------------------------------------------|-----------------------------------------------|-----------------------------------------------------|-----------------------------------------------------|-----------------|
|                |                 | As <sub>tot</sub><br>(mg kg <sup>-1</sup> ) | As <sub>tot</sub><br>(µg L <sup>-1</sup> ) | Arsenate<br>(µg L <sup>-1</sup> ) | Arsenite<br>(µg L <sup>-1</sup> ) | methylated<br>species<br>(µg L <sup>-1</sup> ) | thiolated<br>species<br>(µg L <sup>-1</sup> ) | methylthiolated<br>species<br>(µg L <sup>-1</sup> ) | unidentified As<br>species<br>(µg L <sup>-1</sup> ) |                 |
| TP A1          | 10              | 196                                         | 24.5                                       | 20.8                              | 2.2                               | 0.2                                            | 0.0                                           | 0.3                                                 | 0.8                                                 | 112             |
|                | 50 <sup>a</sup> |                                             | 132                                        | 2.0                               | 37.7                              | 6.9                                            | 3.6                                           | 8.0                                                 | 1.0                                                 | 47              |
|                | 60              | 5.1                                         | 69.8                                       | 1.3                               | 10.0                              | 4.7                                            | <0.1                                          | 1.5                                                 | 0.8                                                 | 28              |
| TP A5          | 10              | 9.37                                        | 15.7                                       | <0.1                              | 0.9                               | 10.6                                           | <0.1                                          | 0.1                                                 | 2.5                                                 | 90              |
|                | 60              | 3.77                                        | 6.14                                       | <0.1                              | 0.5                               | 5.2                                            | <0.1                                          | <0.1                                                | 1.4                                                 | 116             |

<sup>a</sup> Porewater data from 50 cm are provided additionally due to the very low recovery in the 60 cm As speciation data (the reason for the large As loss in this sample is currently unclear)



**Table S3:** Additional primer sets tested. The primer sets were tested with PCR cycling programs varying in annealing temperature, annealing and elongation times as well as cycle numbers, variations in primer concentrations and different PCR master mixes.

| Gene        | Primer set                 | Forward primer                                      | Reverse primer                               | Expected PCR product length (bp) | References                          | Problem                                                        |
|-------------|----------------------------|-----------------------------------------------------|----------------------------------------------|----------------------------------|-------------------------------------|----------------------------------------------------------------|
| <i>aioA</i> | aoxFM1-2f/<br>aoxBM2-1R    | CCA CTT CTG CAT<br>CGT GGG NTG YGG<br>NTA           | GGA GTT GTA GGC<br>GGG CCK RTT RTG<br>DAT    | 550                              | Quemeneur et al., 2010 <sup>a</sup> | PCR product unspecific (obtained sequences not <i>aioA</i> )   |
|             | arrAf/<br>arrAr            | AAG GTG TAT GGA<br>ATA AAG CGT TTG<br>TBG GHG AYT T | CCT GTG ATT TCA<br>GGT GCC CAY TYV<br>GGN GT | 160-200                          | Malasarn et al., 2004               | PCR product unspecific (obtained sequences not <i>arrA</i> )   |
| <i>arrA</i> | HAArrA-D1f/<br>HAArrA-G2-r | CCG CTA CTA CAC<br>CGA GGG CWW YTG<br>GGR NTA       | CGT GCG GTC CTT<br>GAG CTC NWD RTT<br>CCA CC | 500                              | Kulp et al., 2006                   | No PCR product                                                 |
|             | TOArraF/<br>TOArraR        | GGA TAA AAA CAC<br>CGA TGA AGM GNA<br>CNA AYC       | CGT TGG CTC TTT<br>CCC ASW YTC NGG<br>RT     | 1446                             | Osborne et al., 2015 <sup>b</sup>   | No PCR product                                                 |
|             | ArrAUF1/<br>ArrAUR3        | TGT CAA GGH TGT<br>ACB DCH TGG                      | GCW GCC CAY TCV<br>GGN GT                    | 825                              | Fisher et al., 2008 <sup>c</sup>    | No PCR product                                                 |
| <i>arsC</i> | arsCGP-Fw/<br>arsCGP-Rv    | TGC TG ATTT AGT<br>TGT TAC GC                       | TTC CTT CAA CCT<br>ATT CCC TA                | 353                              | Villegas-Torres et al., 2011        | Multiple bands, sequences from band of correct not <i>arsC</i> |
|             | arsC6F/<br>arsC6R1         | CAC VTG CMG RAA<br>DGC RAR RVV DTG<br>GCTCG         | YKY CRY CBR YVA<br>DRA TCG G                 | 300-400                          | Escudero et al., 2013               | No PCR product                                                 |
|             | arsC6F/<br>arsC6R2         | CAC VTG CMG RAA<br>DGC RAR RVV DTG<br>GCTCG         | TTR WAS CCN ACG<br>WTA ACA KKH YYK<br>YC     | 300-400                          | Escudero et al., 2013               | No PCR product                                                 |
|             | arsC6F/<br>arsC6R3         | CAC VTG CMG RAA<br>DGC RAR RVV DTG<br>GCTCG         | YYV HWY TSK TST<br>TCR YKR AAS CC            | 300-400                          | Escudero et al., 2013               | No PCR product                                                 |

<sup>a</sup> Quemeneur M, Cebon A, Billard P, Battaglia-Brunet F, Garrido F, Leyval C *et al.* Population structure and abundance of arsenite-oxidizing bacteria along an arsenic pollution gradient in waters of the Upper Isle River Basin, France. *Appl Environ Microbiol* 2010; **76**: 4566-4570.

<sup>b</sup> Osborne TH, McArthur JM, Sikdar PK, Santini JM. Isolation of an arsenate-respiring bacterium from a redox front in an arsenic-polluted aquifer in West Bengal, Bengal Basin. *Environ Sci Technol* 2015; **49**: 4193-4199.

<sup>c</sup> Fisher E, Dawson AM, Polshyna G, Lisak J, Crable B, Perera E *et al.* Transformation of inorganic and organic arsenic by *Alkaliphilus oremlandii* sp. nov. strain OhLAs. *Ann N Y Acad Sci* 2008; **1125**: 230-241.

**Table S4:** Next-related sequences of the groups for each gene (as defined from the phylogenetic trees) as identified by BLAST. Translated amino acid sequences were used for the BLAST search (BlastX).

| OTU  | No of ASVs | No of sequences | Next relative                   |                                                         |              | Next cultured relative     |                                                                               |              |
|------|------------|-----------------|---------------------------------|---------------------------------------------------------|--------------|----------------------------|-------------------------------------------------------------------------------|--------------|
|      |            |                 | Accession number                | Name                                                    | Identity (%) | Accession number           | Name                                                                          | Identity (%) |
| aioA | Group 1    | 30              | 14786 ALE71852, AKS29925        | uncultured bacterium                                    | 93-99        | TIQ91915                   | <i>Mesorhizobium</i> sp.                                                      | 76-83        |
|      | Group 2    | 20              | 9936 AIZ47505, ADE33048         | uncultured bacterium                                    | 86-99        | RBL67125, AGD80889         | <i>Pseudomonas</i> sp., <i>Bacillus</i> sp.                                   | 67-75        |
|      | Group 3    | 18              | 3565 AKS30090, AIZ47582         | uncultured bacterium                                    | 81-99        | WP_128627613, AIL29043     | <i>Mesorhizobium delmotii</i> , <i>Ochrobactrum cytisi</i>                    | 72-96        |
|      | Group 4    | 9               | 1594 AIZ47582, AKS30090         | uncultured bacterium                                    | 88-92        | AIL29043, APH81304         | <i>Ochrobactrum cytisi</i> , <i>Agrobacterium tumefaciens</i>                 | 81-82        |
|      | Group 5    | 3               | 488 ALE71852                    | uncultured bacterium                                    | 98-100       | TIQ91915                   | <i>Mesorhizobium</i> sp.                                                      | 97-99        |
| arrA | Group 1    | 39              | 22506 AIZ48352, AIZ48406        | uncultured bacterium                                    | 78-99        | AEK98623, WP_041096744     | <i>Geobacter uraniireducens</i> , <i>Sulfuritalea hydrogenivorans</i>         | 71-88        |
|      | Group 2    | 25              | 10639 AFG33222, AGT99106        | uncultured bacterium                                    | 92-99        | AEK98608, WP_091938667     | <i>Geobacter uraniireducens</i> , <i>Propionivibrio dicarboxylicus</i>        | 81-92        |
|      | Group 3    | 16              | 7512 AIZ48282, CAZ04936         | uncultured bacterium                                    | 86-96        | AEK98608, BAM71999         | <i>Geobacter uraniireducens</i> , <i>Geobacter</i> sp. OR-1                   | 82-96        |
|      | Group 4    | 10              | 4971 TRZ93289                   | uncultured bacterium                                    | 80-94        | WP_041096744, ASB34198     | <i>Sulfuritalea hydrogenivorans</i> , <i>Citrobacter</i> sp.                  | 80-92        |
|      | Group 5    | 5               | 3957 BAM71903, AGE47838         | uncultured bacterium                                    | 85-100       | BAM71999, AUB45117         | <i>Geobacter</i> sp. OR-1, <i>Citrobacter</i> sp.                             | 82-86        |
|      | Group 6    | 11              | 2621 AIZ48419, AIZ48396         | uncultured bacterium                                    | 89-99        | AEK98606, ASB34198         | <i>Geobacter uraniireducens</i> , <i>Citrobacter</i> sp.                      | 79-88        |
|      | Group 7    | 5               | 762 AGT99107                    | uncultured bacterium                                    | 89-94        | AEK98606                   | <i>Geobacter uraniireducens</i>                                               | 81-85        |
| arsC | Group 1    | 21              | 26281 OGP54167, PKN69701        | uncultured bacterium                                    | 66-76        | OPY19142, OPY86753         | <i>Syntrophus</i> sp., <i>Smithella</i> sp.                                   | 65-71        |
|      | Group 2    | 17              | 14868 RME96185, OGG04701        | uncultured bacterium                                    | 72-82        | WP_077541149, WP_094759900 | <i>Sedimentisphaera cyanobacteriorum</i> , <i>Sedimentisphaera salicampi</i>  | 68-80        |
|      | Group 3    | 7               | 12901 WP_107743932              | uncultured bacterium                                    | 51-83        | WP_012376477, XP_024744453 | <i>Opitutus terrae</i> , <i>Melinomyces bicolor</i>                           | 51-81        |
|      | Group 4    | 10              | 7164 RME43594, WP_145370046     | uncultured bacterium                                    | 62-67        | WP_072150859, WP_105497273 | Cand. <i>Kryptobacter tengchongensis</i> , Cand. <i>Sulfopaludibacter</i> sp. | 59-66        |
|      | Group 5    | 5               | 4756 OGP54167                   | uncultured bacterium                                    | 82-83        | WP_106821703               | <i>Syntrophobacter</i> sp.                                                    | 64-66        |
|      | Group 6    | 2               | 4728 WP_057292299, EFS15381     | <i>Noviherbaspirillum</i> sp., <i>Shigella flexneri</i> | 74-76        | WP_057292299, EFS15381     | <i>Noviherbaspirillum</i> sp., <i>Shigella flexneri</i>                       | 74-76        |
|      | Group 7    | 4               | 4624 WP_076269977, WP_115994965 | <i>Paenibacillus</i> sp., <i>Cohnella lupini</i>        | 84-98        | WP_076269977, WP_115994965 | <i>Paenibacillus</i> sp., <i>Cohnella lupini</i>                              | 84-98        |
|      | Group 8    | 2               | 3045 WP_012468680               | <i>Geobacter lovleyi</i>                                | 63           | WP_012468680               | <i>Geobacter lovleyi</i>                                                      | 63           |
|      | Group 9    | 2               | 2715 OGX19154                   | uncultured bacterium                                    | 86-91        | WP_128700398               | <i>Vampirococcus</i> sp.                                                      | 82-87        |
|      | Group 10   | 2               | 2558 TAJ07364, GBD09074         | uncultured bacterium                                    | 51-67        | CUS80610, WP_073093409     | Cand. <i>Kryptobacter tengchongensis</i> , <i>Thermosyntropha lipolytica</i>  | 55-66        |
|      | Group 11   | 3               | 2328 OGV43810                   | uncultured bacterium                                    | 76-77        | RUM36967                   | <i>Desulfohalobus</i> sp.                                                     | 65-66        |
